1 **Abstract**

2 Introduced large herbivores have partly filled ecological gaps formed in the late  
3 Pleistocene, when many of the Earth's megafauna were driven extinct. However,  
4 surviving predators are widely considered unable to influence introduced megafauna,  
5 leading them to exert unusually strong herbivory and disturbance-related effects. We  
6 report on a behaviorally-mediated trophic cascade between cougars (*Puma concolor*) and  
7 feral donkeys (*Equus africanus asinus*) at desert wetlands in North America. In response  
8 to predation of juveniles, donkeys shifted from nocturnal to almost exclusively diurnal,  
9 thereby avoiding peaks in cougar activity. Furthermore, donkeys reduced the time they  
10 spent at desert wetlands by 87%: from 5.5 hours a day to 0.7 hours at sites with predation.  
11 These shifts in activity were associated with increased activity and richness of other  
12 mammal species and reduced disturbance and herbivory-related effects on these  
13 ecologically-distinct wetland ecosystems, including 49% fewer trails, 35% less trampled  
14 bare ground, and 227% more canopy cover. Cougar predation on introduced donkeys  
15 rewires an ancient food web, with diverse implications for modern ecosystems.  
16

## 1 Introduction

2 Many of the world's largest herbivores and predators were lost in the late Pleistocene,  
 3 most likely due to human hunting [1, 2]. A second wave of declines is ongoing, as the  
 4 majority of surviving large herbivore species (henceforth megafauna) are now threatened  
 5 with extinction [3]. Yet several megafauna species have also been introduced, thereby  
 6 restoring lost species richness and potential ecological functions [4, 5]. However, it has  
 7 long been assumed that surviving predators are incapable of exerting ecologically-  
 8 significant predation pressure on introduced megafauna, leading to unusually strong  
 9 herbivory and disturbance-related effects on modern ecosystems relative to native  
 10 megafauna (Fig. 1a-b).

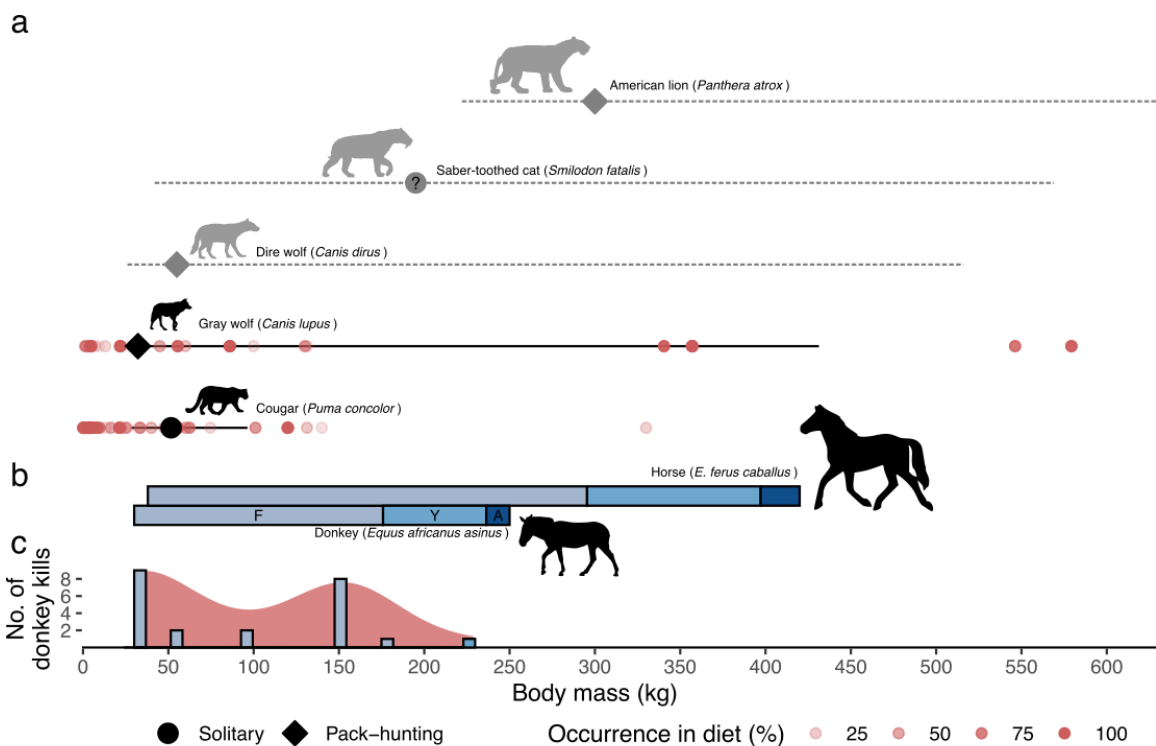

11

12 **Fig 1. Body size and hunting style determine predator-prey interactions and may**  
 13 **constrain the ability of extant predators to influence introduced megafauna.** X-axis  
 14 (body mass) is shared across all subplots. **a.** North American apex predators before and

1 after the late Pleistocene extinctions. Horizontal lines indicate theoretical optimum prey  
2 body mass range of extant (black) and extinct (dashed) predators [from 12]. Points  
3 indicate average predator body mass and hunting style, which remains uncertain for  
4 *Smilodon fatalis* (denoted with question mark). Red points indicate published prey items  
5 by body mass, with transparency denoting the frequency of prey occurrence in diet [data  
6 from 33]. Of extant predators, only the cougar (*Puma concolor*) substantially overlaps in  
7 geographic distribution with introduced equids in North America [29, 51]. **b.** Estimated  
8 body mass ranges for equid age classes (F=foal, Y=yearling, A=adult). **c.** Body mass  
9 density distribution (red fill) and frequency (overlaid bars) of cougar donkey kills from  
10 field surveys (this study).

11

12 We report on a novel trophic cascade [6] between cougars (*Puma concolor*) and  
13 feral donkeys (*Equus africanus asinus*) in North America. Cougars co-occurred with a  
14 diversity of equid species for more than a million years until the North and South  
15 American late Pleistocene extinctions ~9-12,000 years ago [7]. Paleoecological evidence,  
16 however, suggests that cougar-equid interactions may have been uncommon, with equids  
17 mainly preyed upon by larger or pack-hunting now-extinct predators [Fig. 1a-b, 8].  
18 Cougars are likewise widely considered in research and policy as incapable of  
19 significantly influencing introduced equid populations or ecologies [9]. Despite this, we  
20 mapped widespread predation of juvenile donkeys across the Sonoran and Mojave  
21 Deserts of North America (Fig. 1c) and recorded the first, to our knowledge, documented  
22 predation of a yearling (Fig. 2a-b) and foal (Fig. 2c-d).

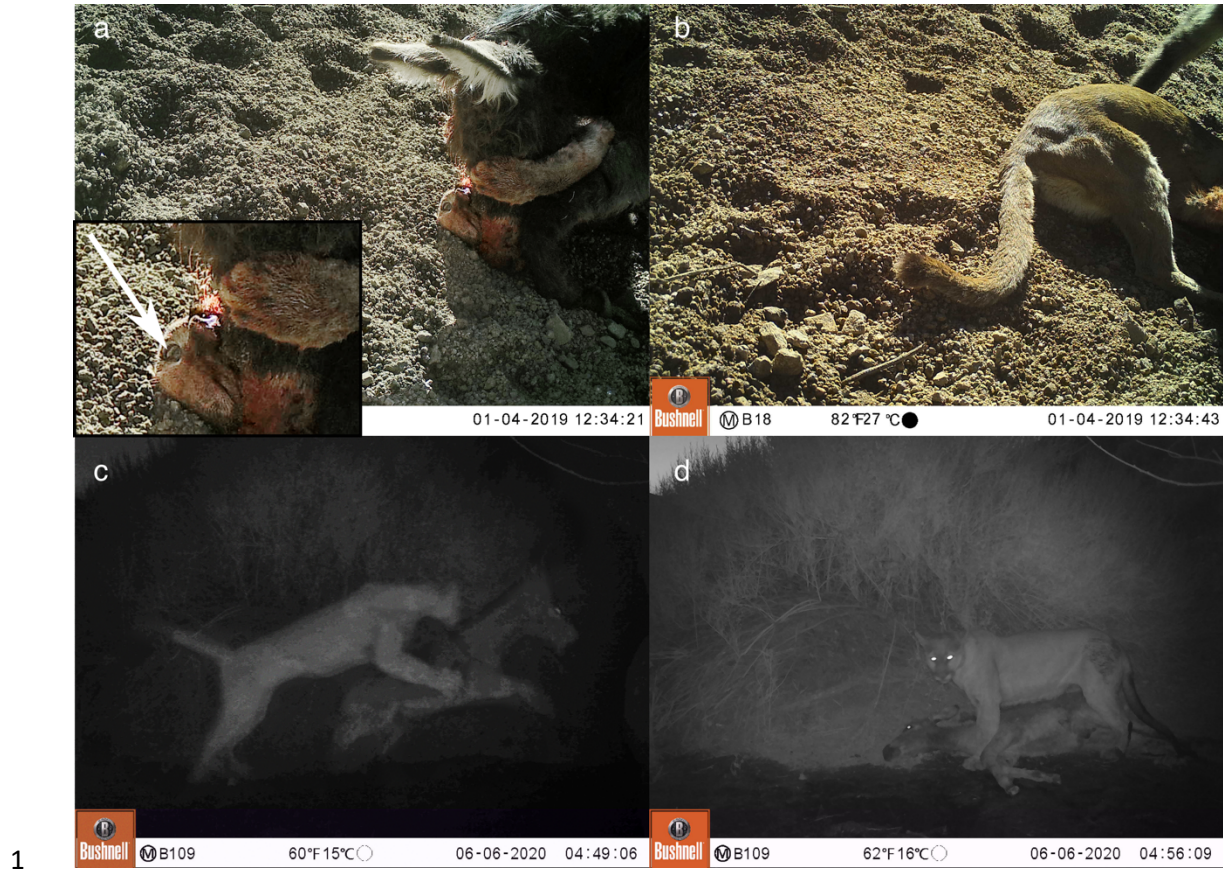

**Fig 2. First reported predation of feral donkeys by cougars, captured by trail camera.** a-b. Successful predation of a yearling donkey in the Sonoran Desert, Arizona. The cougar is looking up from the ground. Arrow in inset points to the cougar's left eye. c-d. Predation of a foal in Death Valley National Park, Mojave Desert, California. Donkey ages were determined from tooth eruption sequences of carcasses. Images a and c were tonally adjusted for visibility (see S1 Fig for original versions).

While predation influences populations through direct killing, it also drives predator-avoidance behaviors with cascading implications for the effects of herbivores on ecosystems [10]. However, it remains contested whether predation of juveniles can drive ecologically-relevant, behaviorally-mediated trophic cascades, as invulnerable adults may not respond to predation risk [11-13]. To answer this question, we investigated whether predation by cougars influenced donkey behavior and their associated effects on other vertebrates and vegetation at desert wetlands.

## 1 **Results**

2 To understand if donkeys altered their behavior to avoid cougar predation, we compiled  
3 trail camera images from 24 desert wetlands in the Sonoran and Mojave Deserts spanning  
4 9,303 trap nights (S2 Fig, S1 Table). We compared donkey activity patterns between  
5 wetlands in regions with low densities of cougars and no evidence of predation  
6 (henceforth ‘low predation risk’) and regions with abundant cougars and widespread  
7 predation (‘high predation risk’). The high predation risk regions also included sites  
8 shielded by human recreational activity where cougars were locally absent, which were  
9 treated separately (‘human shielding’ [14]).

10 Donkeys significantly changed their behavior in response to predation risk (Fig  
11 3a, S3 Fig). Donkeys were primarily nocturnal at low predation risk wetlands, but  
12 became almost exclusively diurnal at high predation risk wetlands, thereby avoiding the  
13 peak of cougar activity (Fig 3a). Indeed, the nighttime attack captured on camera (Fig 2c-  
14 d) was one of the few nighttime donkey visits to that wetland—with immediate  
15 consequences for the foal. Corroborating that these behavioral changes were a direct  
16 response to predation risk from cougars, donkeys were again nocturnal at human-shielded  
17 sites within this same high predation risk region (Fig 3a).

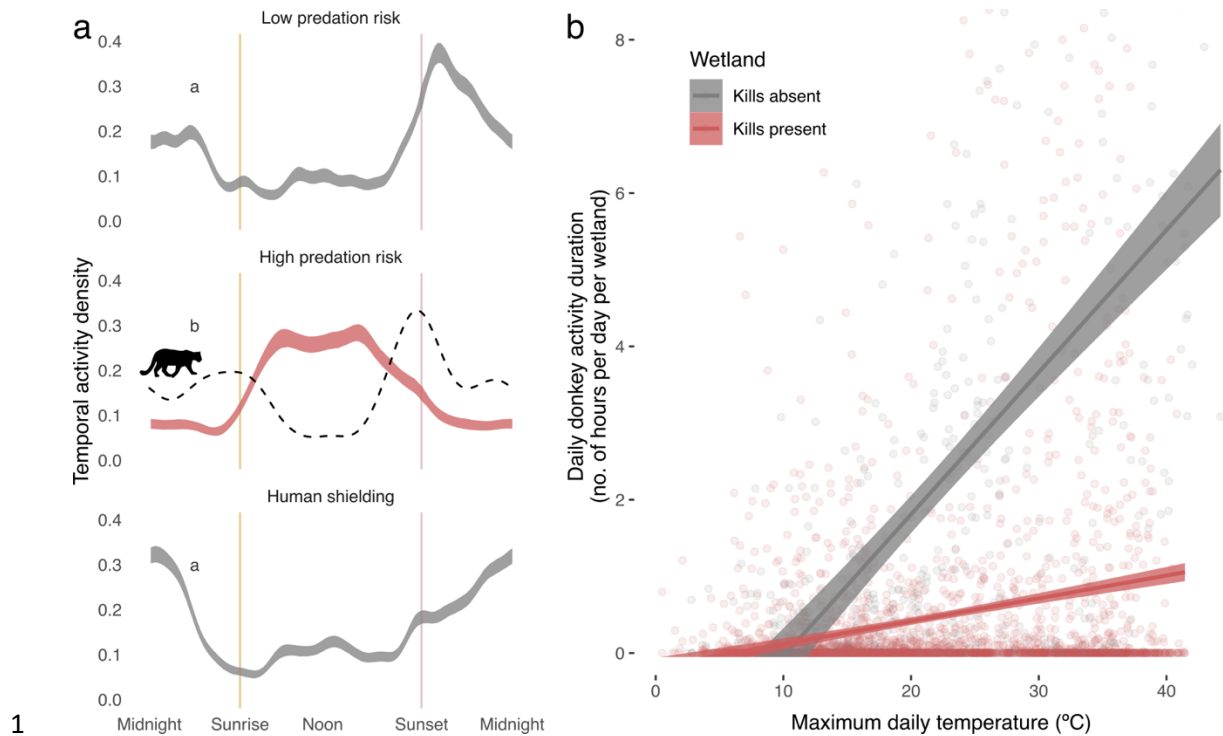

1

2 **Fig 3. Cougars shape donkey behavior at desert wetlands. a.** Donkey temporal  
3 activity under different levels of predation risk. X-axis indicates time of day. Ribbon  
4 indicates donkey activity 95% confidence intervals from bootstrapped detections, with  
5 letters indicating significance groupings based on non-overlap of confidence intervals  
6 (see S3 Fig). Dashed line indicates cougar activity pattern. ‘Low predation risk’ = sites in  
7 regions with low densities of cougars where predation was absent, ‘high predation risk’ =  
8 sites in regions with cougars and widespread predation, ‘human shielding’ = wetlands  
9 with recreational activity where cougars were absent, despite proximity to high predation  
10 risk wetlands. **b.** Relationship between maximum daily temperature and the activity of  
11 donkeys at wetlands (hours/day/site) for sites with and without predation.

12

13 Temperature drives water requirements, particularly in desert environments [15].

14 Desert wetlands can thus become foci of activity for water-dependent animals such as

15 donkeys during the summer. To understand if cougars mediate this interaction, we

16 calculated the daily activity of donkeys at each wetland (hours/day/site) from trail camera

17 data and analyzed how it was shaped by maximum daily temperature and two indicators

1 of predation risk: the presence of kills (cached carcasses) and the presence of cougars.  
2 We used multimodel inference (based on AICc) to choose the most parsimonious model.  
3 Donkey activity was affected by the presence of kills ( $\chi^2=300.4$ ,  $p<0.001$ ),  
4 maximum daily temperature ( $\chi^2=55.4$ ,  $p<0.001$ ), and their interaction ( $\chi^2=14.6$ ,  $p=0.001$ ).  
5 At wetlands without kills, activity reached an average of 5.5 hours/day on days  $\geq 35^\circ\text{C}$   
6 (SD= $\pm 4.4$ , max=16.5, Fig 3b). However, at sites with kills, activity remained low and  
7 relatively stable regardless of temperature, averaging 0.7 hours/day on days  $\geq 35^\circ\text{C}$  ( $\pm 1.7$ ,  
8 max=12.6, Fig 3b). The presence of cougars (i.e., at sites with cougars but no kills) also  
9 affected activity, but to a lesser extent and was not included in the most parsimonious  
10 model (S4 Fig).

11 Megafauna, including introduced equids, can competitively exclude smaller  
12 species from water points [16, 17]. We thus identified all mammal species larger than a  
13 cottontail rabbit (*Sylvilagus audubonii*) from camera trap imagery and assessed whether  
14 cougar predation on donkeys, and corresponding changes in donkey behavior, was  
15 associated with increased use of wetlands by other species.

16 As with donkeys, the activity duration of other mammals increased with  
17 maximum daily temperature (Fig 4a,  $z=8.1$ ,  $p<0.001$ ). However, this was strongest at  
18 wetlands with cougar predation, where donkey activity was reduced (Fig 4a, post hoc t-  
19 ratio= $-6.46$ ,  $p<0.001$ ). Indeed, across all sites, the daily activity of other mammals was  
20 negatively related to the activity of donkeys on that same day (Fig 4b  $z=4.5$ ,  $p<0.001$ ),  
21 which further supports that cougar predation on donkeys itself, not other factors,  
22 facilitates the activity of other mammal species at these wetlands. These increases in



- 1 activity corresponded with higher mammal species richness at sites with active donkey
- 2 predation (Fig 4c,  $W=37.5$ ,  $p=.045$ ).

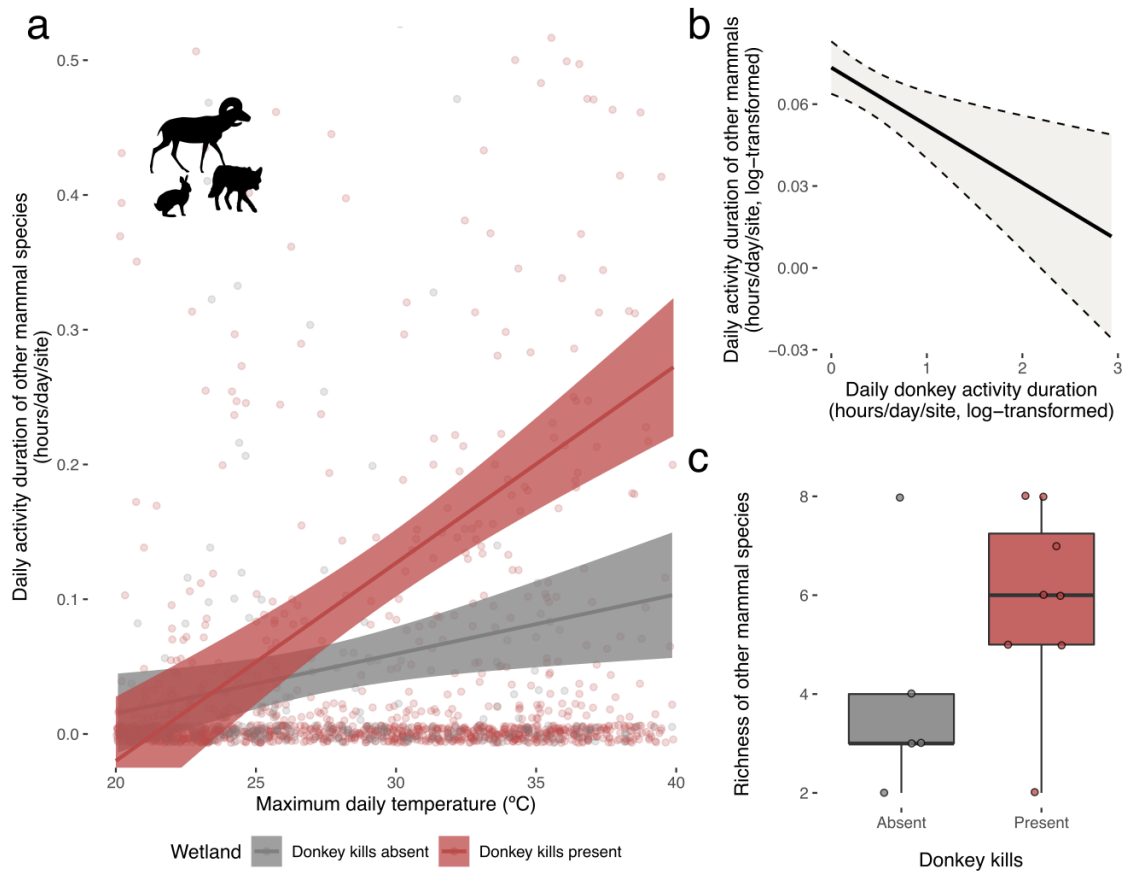

3

4 **Fig 4. Predation on feral donkeys was associated with increased utilization of**  
5 **wetlands by other mammal species. a.** Duration of activity by other mammal species at  
6 wetlands increased with maximum daily temperature ( $\chi^2=210.25$ ,  $p<0.001$ ), but to a  
7 greater extent at sites with active donkey predation (interaction term:  $t\text{-ratio}=-6.42$ ,  
8  $p<0.001$ ). **b.** Daily activity duration of other mammals had a negative relationship to the  
9 activity of donkeys on that day, across all sites ( $z=4.5$ ,  $p<0.001$ ). Durations were log-  
10 transformed to reduce over dispersion. **c.** Richness of other mammal species at sites with  
11 and without donkey kills ( $W=37.5$ ,  $p=.045$ ). Given unequal trap nights, richness was  
12 interpolated following [52].

13

14 Cougar predation on donkeys was also associated with reduced herbivory and

15 disturbance-related effects on these ecosystems. We collected data on nine soil and

1 vegetation responses encompassing potential disturbance and herbivory-related effects of  
2 donkeys on desert wetlands (S6 Fig). We synthesized these data with a Principal  
3 Coordinates Analysis (PCoA) to find the primary axes by which wetlands differed from  
4 each other, which revealed significant differences between sites with and without kills  
5 (PERMANOVA:  $R^2=0.20$ ,  $F=3.54$ ,  $p<0.001$ , Fig 4a-c). Wetlands with kills had more  
6 vegetation, including 227% more canopy cover (from  $12.7\pm 16\%$  to  $42\pm 34\%$ , mean $\pm$ SD,  
7 S5 Fig), and 183% more vegetation around water perimeter (from  $21\pm 21\%$  to  $60\pm 18\%$ ,  
8 S5 Fig). Likewise, these sites had less disturbance, including ~49% fewer trails to water  
9 (from  $3.2\pm 2$ , to  $1.6\pm 0.7$ , S5 Fig) and 35% less trampled bare ground (from  $77\pm 20\%$  to  
10  $50\%\pm 16\%$ , S5 Fig).

11 The presence of cougars themselves (independent of kills), topographic  
12 complexity, and elevation did not explain dissimilarity in wetland structure ( $p=0.27-0.33$ ,  
13 S2 Table). Likewise, geographic distances between sites did not influence wetland  
14 dissimilarity (multiple regression on distance matrices,  $R^2=0.007$ ,  $F=0.82$ ,  $p=0.58$ ),  
15 indicating that the differences between wetlands were driven by predation upon donkeys  
16 and not by underlying spatial gradients.

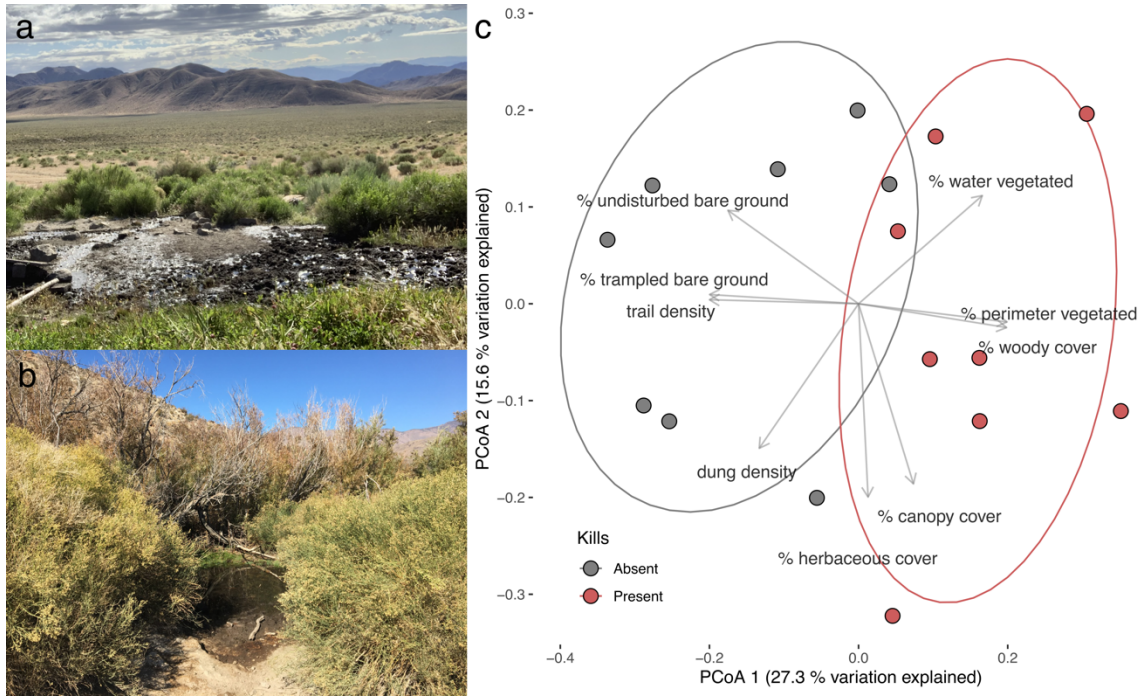

1

2 **Fig 5. Cougar predation is associated with reduced herbivory and disturbance-**  
3 **related influences on desert wetlands. A.** A representative wetland lacking both  
4 cougars and kills compared to a nearby (~6km) wetland (B) where cougars and kills were  
5 present (site of the kill in Fig 2C-D). Photos were taken at a similar distance from water's  
6 edge, by EJJ (A) and OMM (B). C. Principal coordinates analysis (PCoA) showing  
7 significant differences in wetland structure with and without cougar predation on donkeys  
8 (PERMANOVA,  $F=3.5$ ,  $p<0.001$ ). Each point is a wetland. Relationship between  
9 response variables and PCoA axes are indicated by overlaid arrows and text. The  
10 presence of cougars themselves, elevation, and terrain complexity were not significant  
11 (PERMANOVA  $p=0.27-0.33$ ), nor was the geographic distances between sites ( $F=0.82$ ,  
12  $p=0.58$ ). See S5 Fig for response of individual variables.

13

## 14 Discussion

15 For more than a million years, equids co-occurred with cougars and much larger  
16 predators, of which the latter were likely their primary predators [8]. Cougar predation on  
17 juvenile donkeys nonetheless was strongly associated with altered donkey behavior,  
18 increased activity and richness of other mammals, and reduced effects on wetland  
19 vegetation and soil. This adds to growing evidence that extant predators have a greater

1 capacity to influence introduced equids than typically considered. This includes wolves  
2 (*Canis lupus*) and brown bears (*Ursus arctos*) in Eurasia and North America, jaguars  
3 (*Panthera onca*) in North and South America, and dingoes (*Canis dingo*) in Australia  
4 (Fig 6, S3 Table). Cougars can be significant predators of introduced horses as well [18,  
5 19], suggesting the possibility of behaviorally-mediated trophic cascades among these  
6 larger megafauna [6] (Fig 6). The return of equids after their ~12,000 year hiatus—and  
7 predation upon them by cougars—suggests a rewiring of food webs [20], with diverse  
8 implications for modern ecosystems, the cougars and their prey, and for how these  
9 species are treated in policy.

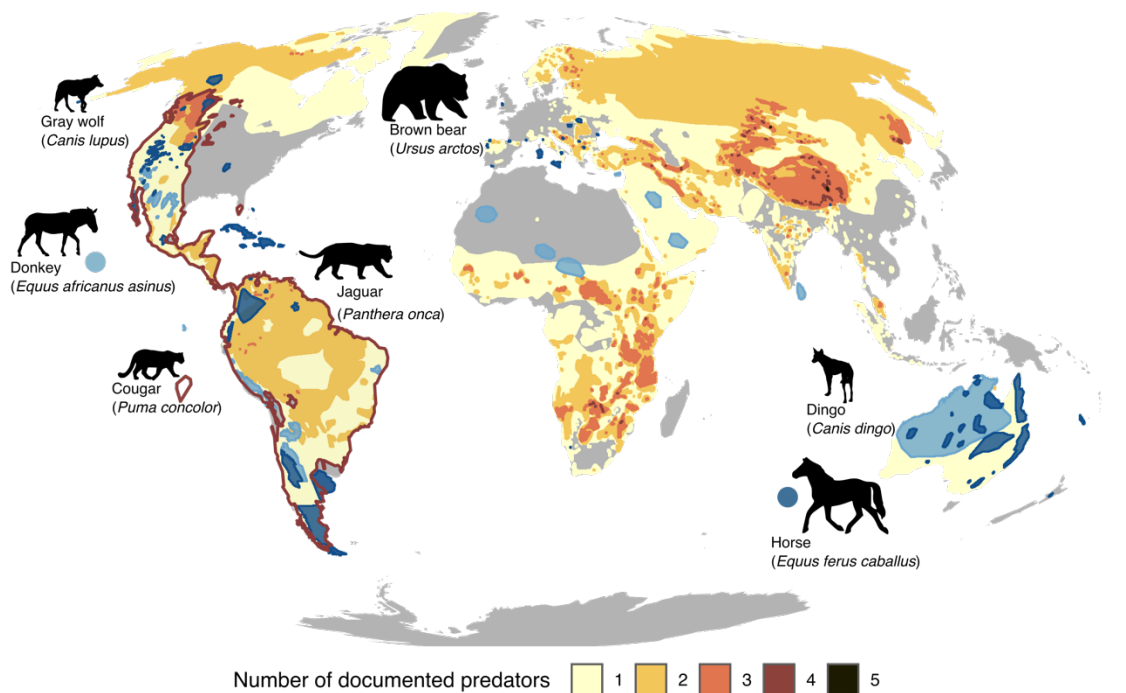

10

11 **Fig 6. Distribution of introduced equids and species richness of predators**  
12 **documented predating on equids.** Introduced ranges of horses (dark blue) and donkeys  
13 (light blue) are overlaid on predator species richness (yellow-orange-black gradient).  
14 Cougar distribution is demarcated with red border overlay. The predators included have  
15 all been documented preying on equids. Those highlighted with icons (see S3 Table)  
16 have the potential to overlap in distribution with feral equids. Feral equids are among the

1 most widespread and abundant introduced megafauna species [5, 29]. Though rarely  
2 studied, the predators that survived the late Pleistocene extinctions have greater capacity  
3 to influence feral equids than usually considered. Predator range maps were drawn from  
4 the IUCN Redlist [51], except for the dingo [53]. Introduced equid ranges are from [29].

5

6 The influences of mammalian megafauna on wetlands, particularly in water-  
7 limited drylands, were likely ubiquitous from the early Cenozoic (30-40 million ybp)  
8 until the late Pleistocene extinctions [1, 4]. Megafauna well digging, disturbance, and  
9 herbivory can maintain wetland heterogeneity and water availability [21, 22]. However,  
10 the effects of prehistoric megafauna, even those  $\geq 1,000$  kg, were likely mediated by  
11 predation, if only on juveniles [12]—potentially an ancient parallel to the behaviorally-  
12 mediated trophic cascade driven by cougar predation on juvenile donkeys.

13 Donkeys, cougars, and smaller-bodied prey of cougars, such as bighorn sheep  
14 (*Ovis canadensis*) and mule deer (*Odocoileus hemionus*), are entangled in an emerging  
15 ecological network. In addition to shaping donkey ecology, cougar predation on donkeys  
16 may thus engender novel evolutionary trajectories in cougars [23] and reduce pressure on  
17 their other prey. These relationships may also yield overlooked consequences in response  
18 to ongoing donkey removals and near-ubiquitous cougar persecution. Donkeys were the  
19 primary recorded prey of cougars at our study sites (24 of 29 cached carcasses) and  
20 horses have been documented as primary prey elsewhere [19]: removing equids may thus  
21 lead to increased predation on smaller prey [24].

22 Likewise, killing cougars in service of the livestock industry and to increase  
23 populations of deer and bighorn sheep for conservation and sport hunting [25, 26] may  
24 influence feral equid populations and their ecological effects. As with many apex

1 predators, persecution can reduce the ability of cougar populations to hunt larger, more  
2 challenging prey by removing older individuals and by disrupting the transmission of  
3 hunting techniques from mother to young [27]. Even moderate persecution may thus  
4 reduce the potential for ecologically-significant trophic cascades between cougars and  
5 feral equids, despite their broad geographic overlap (Fig 6).

6         Cougars avoided human recreation sites and were constrained by their need for  
7 topographic or vegetative ambush cover to hunt successfully (S7 Fig) [28]. This created a  
8 mosaic of predation risk, which our study design utilized. However, without experimental  
9 manipulation of cougar presence, the stark differences observed between wetlands with  
10 and without predation remain correlative. Despite this, we argue that the proximity (e.g.,  
11 ~2-6 km) of wetlands shielded by recreation, where vegetative cover was non-existent, to  
12 topographically similar wetlands with active predation and abundant vegetation, indicates  
13 that cougar predation was the primary driver of observed differences in mammal richness  
14 and activity and wetland structure.

15         Horses and donkeys, like the majority of extant megafauna, are threatened in their  
16 native ranges [5]. This has led to calls for more inclusive conservation approaches [29],  
17 which may find productive common ground with conservation efforts to increase  
18 protection and tolerance for cougars and other predators. Doing so may further influence  
19 the ecologies of feral donkeys. For instance, the effects of human shielding and the  
20 ambush cover requirements of cougars suggest that managing recreation and allowing for  
21 the reestablishment of pack-hunting wolves (*Canis lupus*) or larger-bodied jaguars

1 (*Panthera onca*) would shift predation risk into places currently deemed safe, with broad  
2 implications for how feral equids influence ecosystems.

3           The effects of organisms emerge in relation to ecological contexts and are not  
4 essential to their dispersal histories, whether of unassisted colonization or human  
5 introduction [30-32]. If we had conducted this research to enumerate the effects of feral  
6 donkeys on desert wetlands, without quantifying cougar predation, our data would  
7 contain a great degree of inexplicable noise. Instead we find echoes of the late  
8 Pleistocene in a novel trophic cascade between cougars and feral donkeys, with diverse  
9 ecological and evolutionary consequences.

10

## 1 **Materials and Methods**

### 2 **Theoretical predator prey ranges**

3 We followed Van Valkenburgh et al. 2016's [12] formulae to calculate theoretical  
4 optimal prey sizes based on allometric scaling relationships from observed diets in extant  
5 predators (Fig 1). Pack-hunting and solitary hunting (e.g., cougars) species were treated  
6 with separate equations, given the ability of pack-hunting species to cooperatively kill  
7 larger prey [12].

8 Importance of observed prey items for cougars and gray wolves were derived  
9 from CarniDIET [33]. We only included studies that reported the frequency of a prey  
10 item across predator scats in a study. Predator and prey body masses were derived from  
11 Mass of Mammals [34]. Donkey and horse body masses by age class were estimated  
12 from scaling formulae in [35] and were calculated from adult body masses and birth  
13 weights reported in AnAge: The Animal Ageing and Longevity Database (36).

14

### 15 **Carcass and cougar surveys**

16 We surveyed for cougar presence and donkey carcasses at 27 wetlands in Death Valley  
17 National Park. Surveys were conducted by walking the perimeter of wetlands and  
18 investigating every potential trail for cached carcasses [37]. Carcasses and cougar sign  
19 were frequently encountered on tight <0.5 m tall trails through dense riparian vegetation.  
20 Cougar scats were identified visually by size and shape and their frequent association  
21 with very large scrapes. All surveys and scat identification were conducted by EJJ, thus  
22 eliminating inter-observer variability.



1           We classified donkey remains as kills if they were located on cougar trails or if  
2 they were within 20 m of a cougar scat or scrape. Cougar trails usually terminated at the  
3 kill and were defined by their height (<1 m) and because they were unused by living  
4 donkeys—as determined by the lack of donkey track and sign and by camera traps. We  
5 estimated donkey ages by examining tooth wear and eruption sequences following  
6 resources for donkeys and horses [38, 39]. In some cases, where skulls could not be  
7 located, we estimated age by the fusion or lack thereof of appendicular bones. We  
8 estimated the ages of the two photographically captured kills (Fig 2) by locating the  
9 carcasses and evaluating tooth eruption sequences as well.

10

### 11 **Activity patterns of donkeys and cougars**

12 We collected ca. 2.5 million trail camera images (Bushnell Trail Cam Pro) from over five  
13 years and 64 camera stations across 26 wetlands in the Sonoran and Mojave Deserts of  
14 North America (S3 Fig, S1 Table). Sites averaged 388 trap nights per site, with a total of  
15 9,303 trap nights across all sites and all seasons (S1 Table). Sites with less than 10 trap  
16 nights ( $n = 2$ ) were excluded from analysis. All trail cameras were on water or on trails to  
17 water. Some sites contained multiple cameras, depending on the number of water-access  
18 points at each site, which were aggregated for analysis.

19           We evaluated the effect of cougars on the temporal patterns of feral donkeys with  
20 the `overlap` (v0.3.3) and `circular` packages (v0.4-93) in R (v4.0.0). To do so, we  
21 converted clock time to sun time, which is consistent relative to sunrise and sunset and is  
22 derived from the date and geographic coordinates of each trail camera [40, 41]. We

1 compared donkey daily activity patterns between wetlands in regions with low densities  
2 of cougars and no evidence of predation (henceforth ‘low predation risk’) and regions  
3 with abundant cougars and widespread predation (‘high predation risk’). This latter  
4 region also included sites that were shielded by human activity, where cougars were  
5 locally absent [‘human shielding’, 14], despite proximity (e.g. <2 km) to wetlands with  
6 abundant cougars and predation.

7         Sampling effort (e.g., number of trap nights) and the number of donkey detections  
8 varied between sites and between predation risk categories, which would bias pooled  
9 estimates [42]. We therefore resampled our data over 1,000 bootstraps, sampling equally  
10 between predation-risk categories and sites within each category. We selected 25% of the  
11 number of detections in the predation-risk category with the lowest number of detections,  
12 and then drew this quantity equally from each predation-risk category, divided equally  
13 from all sites within each category. From each subset we calculated donkey temporal  
14 activity using a circular von Mises density distribution kernel, as appropriate for time  
15 data [41]. From these resampled density distributions, we calculated 95% confidence  
16 intervals (CIs) to test if there was a significant difference between activity patterns under  
17 different levels of predation-risk, based on the visual overlap or non-overlap of CIs.

18         To understand how cougars influenced the extent to which donkeys utilized  
19 wetlands, we calculated the daily activity duration of donkeys at each wetland by  
20 assigning donkey detections into events, defined as any detection  $\geq 30$  minutes apart from  
21 any other. We then summarized the total event duration per day and site. Given that study  
22 sites ranged across several distinct populations, including low density ones, we focused

1 on one large contiguous population in the Southern Panamint Mountains of Death Valley  
2 National Park (permit number DEVA-2018-SCI-0036). To avoid potential bias, we  
3 monitored every identifiable wetland within this region, although camera thefts and  
4 malfunctions prevented the inclusion of some sites. Unfortunately, density estimates were  
5 not available. This population consisted of 15 wetlands, (3,746 trap nights) and included  
6 sites with kills ( $n = 9$ ) and without ( $n = 6$ ) and sites with camera trap detections of  
7 cougars ( $n = 9$ ) and without ( $n = 6$ ). Note that the presence of cougars and kills did not  
8 perfectly correspond: one site had cougar detections but no kills, another had clear  
9 evidence of kills within the last year, but no detections were made during the study period  
10 (S2 Fig, S1 Table).

11         Given that surface-water dependency is driven by temperature we extracted daily  
12 maximum temperatures from a 4x4 km interpolated national dataset for each site [43].  
13 We then analyzed the effect of local kills, cougar presence, daily maximum temperature,  
14 and their interactions on daily activity with a negative binomial mixed effect model in the  
15 R package ‘glmmTMB’ v1.0.2.1 [44], nesting day within site as random effects. The  
16 presence of kills and cougars were based on study-wide presence or absence. We used  
17 multimodel inference (based on AICc) to remove spurious terms and selected the most  
18 parsimonious model, which included daily maximum temperature, local predation, and  
19 their interaction. Cougar presence itself was not included.

20

## 1 **Vertebrate activity patterns**

2 To understand how donkey activity patterns may in turn alter the activity of other  
3 vertebrate species, we further analyzed trail camera imagery, focusing again on the  
4 Southern Panamints Mountains of Death Valley to control for differences in donkey  
5 population sizes between study areas. Given the large number of images, we only  
6 identified mammals larger than a cottontail rabbit (*Sylvilagus audubonii*). As with the  
7 donkey images, images of the same species were grouped into ‘events’ based on a 30-  
8 minute window.

9 We then analyzed how mammal activity (hours/day/site) varied by maximum  
10 daily temperature and the presence of kills, using a zero-inflated negative binomial  
11 model, nesting day within site. To better understand how this related to donkey activity,  
12 we analyzed how daily mammal activity related to the donkey activity of that same day,  
13 using a negative binomial distribution and nesting day within site as random effects. To  
14 assess if this further corresponded to differences in species richness, we used the R  
15 package ‘iNEXT’ v2.0.20, to interpolate richness (Hill order 0), accounting for  
16 differences in sampling effort at each site [45]. We tested for differences in richness  
17 between sites with and without donkey predation with a Wilcoxon signed rank test for  
18 non-parametric data.

19

## 20 **Effects of feral donkeys on wetlands**

21 To understand if cougars influence the effects of donkeys on wetlands we collected data  
22 from 16 desert wetlands in Death Valley National Park in November of 2019. We

1 focused on pools where donkeys accessed water, at which we measured the percent of  
2 surface water vegetated, the percent of water surface covered by canopy foliage, the  
3 number of access trails per pool, and the percent of the pool's perimeter with woody  
4 vegetation. To quantify the degree of disturbance extending upland from water access  
5 points we laid out 3 parallel 2 m wide and 30 m long belt transects 10 m apart, centered at  
6 spring access points. Sampling locations were not shielded from potential donkey  
7 herbivory and disturbance by geographic barriers (e.g. cliffs). Along the entirety of each  
8 belt transect we counted the number of dung piles, and every 10 m we estimated %  
9 trampled ground, % undisturbed bare ground, % herbaceous cover, and % woody cover  
10 in 1 m<sup>2</sup> quadrats (9 total per site). Although we collected data on plant cover by species,  
11 we did not include it in subsequent analyses because it was confounded by elevation and  
12 edaphic differences across sites, thus not directly capturing the effects of donkeys.

13         Instead of analyzing each of these response variables in sequential analyses, and  
14 because of their non-normality, we calculated Gower distance between sites based on all  
15 nine response variables and conducted a Principal Coordinates Analysis (PCoA), to  
16 identify the primary axes by which wetlands differed from each other. These first two  
17 axes (PCoA 1 and PcoA 2) explained 42.9% of total variation between sites (27.3 and  
18 15.6% respectively). We then analyzed which factors explained differences between  
19 wetlands in this synthetic PCoA space using a PERMANOVA test in the R package  
20 'vegan' v 2.5-6 [46] with 100,000 iterations. We included the presence of kills, the  
21 presence of cougars, elevation, and topographic complexity (S7 Fig) as independent  
22 variables.

1           To further test if these differences could be driven by underlying spatial gradients,  
2 we calculated a geographic distance matrix with the R package ‘geosphere’ v1.5-10[47].  
3 We then conducted a Multiple Regression on Distances Matrices analysis with the  
4 function ‘MRM’ in the R package ‘ecodist’ v2.0.7 [48] with 1,000 iterations, which  
5 tested if the dissimilarity in wetland structure was explained by their distances from each  
6 other and thus underlying spatial gradients.

7

### 8 **Constraints on cougar predation**

9 To understand the factors that constrained interactions between donkeys and cougars, we  
10 evaluated how landscape contexts influenced the probability of cougar presence at sites  
11 with feral donkeys. As others have shown [28], cougars require ambush cover provided  
12 either by vegetation or topography. We thus calculated a synthetic terrain-complexity  
13 variable from a 1/3 arc-second digital elevation model [49], which synthesized terrain  
14 roughness, terrain ruggedness, and slope with a Principal Components Analysis (PCA).  
15 PC1 explained 92.5% of total variation and was subsequently used as a terrain-  
16 complexity variable (S7 Fig).

17 To describe potential riparian ambush cover, we calculated total riparian area and  
18 the number of riparian patches by tracing the boundary of riparian vegetation in QGIS  
19 from satellite imagery (2016, Google), which was validated during field surveys. To test  
20 if anthropogenic landscape factors affected cougar presence, we recorded if springs were  
21 in the vicinity (within 500 m) of campsites or high-use recreation areas.

1           We then employed logistic generalized linear mixed effect models to understand  
2 the relative importance of campsites, terrain-complexity, total riparian area (on a  $\log_{10}$   
3 scale), and the presence of alternative prey at each site (presence or absence of bighorn  
4 sheep or mule deer) in predicting the presence of cougars and the presence of kills, as  
5 determined by field survey data (scat and sign) and camera-trap detections. Given that no  
6 kills occurred at campsites we excluded this factor from that analysis to prevent  
7 singularity failures. The region of each wetland was treated as a random block to control  
8 for spatial autocorrelation (S2 Fig, S1 Table 1). Alternative, more spatially explicit  
9 approaches, for instance using the R package ‘*spdep*’ to create spatial neighborhood  
10 matrices and weights were not possible due to convergence failures in model. We  
11 excluded sites in two survey regions where cougar sign was absent across all sites,  
12 because the lack of sufficient sites within these block levels would weaken inferences  
13 [50] and because absence may have been driven by regional historic or stochastic factors.

14           Using multimodel selection techniques, we selected a final, most parsimonious  
15 model (based on AICc), which retained total riparian area and the presence of campsites  
16 as predictors for cougar presence, both of which were significant ( $\chi^2=6.5$ ,  $p=0.01$ ;  $\chi^2=4.7$ ,  
17  $p=0.03$ , S6 Fig). The most parsimonious model to explain the presence of kills included  
18 only terrain complexity, which was significant ( $\chi^2=5.0$ ,  $p=0.03$ , S6 Fig).

19

## 1 **Acknowledgments**

2 We would like to thank Death Valley National Park staff, particularly Alison Ainsworth  
3 and Mike Reynolds, and Mark Meyers of Peaceful Valley Donkey Rescue (PVDR) for  
4 assistance with field work logistics, equipment donations, and site information. Work was  
5 supported by the Australian Research Council (grant number DP180100272) and  
6 crowdfunding. We would like to thank Mark Davis and Martin Schlaepfer for helpful  
7 feedback on the manuscript.

8

## 9 **References**

- 10 1. Smith FA, Elliott Smith RE, Lyons SK, Payne JL. Body size downgrading of mammals  
11 over the late Quaternary. *Science*. 2018;360(6386):310-3. doi: 10.1126/science.aao5987.
- 12 2. Barnosky AD, Koch PL, Feranec RS, Wing SL, Shabel AB. Assessing the causes of late  
13 Pleistocene extinctions on the continents. *Science*. 2004;306(5693):70-5. doi:  
14 10.1126/science.1101476. PubMed PMID: 15459379.
- 15 3. Ripple WJ, Newsome TM, Wolf C, Dirzo R, Everatt KT, Galetti M, et al. Collapse of the  
16 world's largest herbivores. *Science Advances*. 2015;1:e1400103.
- 17 4. Lundgren EJ, Ramp D, Rowan J, Middleton O, Schowanek SD, Sanisidro O, et al.  
18 Introduced herbivores restore Late Pleistocene ecological functions. *Proc Natl Acad Sci USA*.  
19 2020;117(14):7871-8. doi: 10.1073/pnas.1915769117.
- 20 5. Lundgren EJ, Ramp D, Ripple WJ, Wallach AD. Introduced megafauna are rewilding the  
21 Anthropocene. *Ecography*. 2018;41:857-66. doi: 10.1111/ecog.03430.
- 22 6. Wallach AD, Ripple WJ, Carroll SP. Novel trophic cascades: apex predators enable  
23 coexistence. *Trends Ecol Evol*. 2015;30(3):146-53. doi: 10.1016/j.tree.2015.01.003. PubMed  
24 PMID: 25687158.
- 25 7. Williams JW, Grimm EG, Blois J, Charles DF, Davis E, Goring SJ, et al. The Neotoma  
26 Paleocology Database: a multi proxy, international community-curated data resource.  
27 *Quaternary Research*. 2018;89:156-77.
- 28 8. DeSantis LR, Haupt RJ. Cougars' key to survival through the Late Pleistocene extinction:  
29 insights from dental microwear texture analysis. *Biol Lett*. 2014;10(4):20140203.
- 30 9. National Research Council. *Using Science to Improve the BLM Wild Horse and Burro  
31 Program: A Way Forward*. Washington, D.C.: The National Academies Press; 2013.
- 32 10. Laundré JW, Hernández L, Ripple WJ. The landscape of fear: ecological implications of  
33 being afraid. *The Open Ecology Journal*. 2010;3(1).
- 34 11. Sandom CJ, Middleton O, Lundgren E, Rowan J, Schowanek SD, Svenning J-C, et al.  
35 Trophic rewilding presents regionally specific opportunities for mitigating climate change.  
36 *Philosophical Transactions of the Royal Society B*. 2020;375(1794):20190125.
- 37 12. Van Valkenburgh B, Hayward MW, Ripple WJ, Meloro C, Roth VL. The impact of large  
38 terrestrial carnivores on Pleistocene ecosystems. *Proc Natl Acad Sci U S A*. 2016;113(4):862-7.  
39 doi: 10.1073/pnas.1502554112. PubMed PMID: 26504224; PubMed Central PMCID:  
40 PMC4743832.



- 1 13. Sinclair A, Mduma S, Brashares JS. Patterns of predation in a diverse predator–prey  
2 system. *Nature*. 2003;425(6955):288-90.
- 3 14. Beschta RL, Painter LE, Ripple WJ. Trophic cascades at multiple spatial scales shape  
4 recovery of young aspen in Yellowstone. *For Ecol Manage*. 2018;413:62-9.
- 5 15. Cain III JW, Krausman PR, Rosenstock SS, Turner JC. Mechanisms of thermoregulation  
6 and water balance in desert ungulates. *Wildlife Society Bulletin*. 2006;34(3):570-81.
- 7 16. Valeix M, Chamailé-Jammes S, Fritz H. Interference competition and temporal niche  
8 shifts: elephants and herbivore communities at waterholes. *Oecologia*. 2007;153(3):739-48.
- 9 17. Hall LK, Larsen RT, Westover MD, Day CC, Knight RN, McMillan BR. Influence of exotic  
10 horses on the use of water by communities of native wildlife in a semi-arid environment. *J Arid*  
11 *Environ*. 2016;127:100-5. doi: <https://doi.org/10.1016/j.jaridenv.2015.11.008>.
- 12 18. Turner JW, Wolfe ML, Kirkpatrick JF. Seasonal mountain lion predation on a feral horse  
13 population. *Can J Zool*. 1992;70:929-34.
- 14 19. Andreasen AM. Source-sink dynamics and individual variation in prey selection and  
15 habitat selection of mountain lions in the Great Basin of Nevada: University of Nevada, Reno;  
16 2014.
- 17 20. ` MM. Rewilding ecological communities and rewiring ecological networks. *Perspectives*  
18 *in ecology and conservation*. 2017;15(4):257-65.
- 19 21. Naiman RJ, Rogers KH. Animals and system-level characteristics in river corridors.  
20 *Bioscience*. 1997;47(8):521-9.
- 21 22. Kodric-Brown A, Brown JH. Native fishes, exotic mammals, and the conservation of  
22 desert springs. *Front Ecol Environ*. 2007;5(10):549-53. doi: 10.1890/070002.
- 23 23. Cattau CE, Fletcher RJ, Jr., Kimball RT, Miller CW, Kitchens WM. Rapid morphological  
24 change of a top predator with the invasion of a novel prey. *Nature Ecology and Evolution*.  
25 2017;2(1):108-15. doi: 10.1038/s41559-017-0378-1. PubMed PMID: 29180705.
- 26 24. Cliff HB, Jones ME, Johnson CN, Pech RP, Heyward RP, Norbury GL. Short-term pain  
27 before long-term gain? Suppression of invasive primary prey temporarily increases predation on  
28 native lizards. *Biol Invasions*. 2020;22(6):2063-78. doi: 10.1007/s10530-020-02239-z.
- 29 25. Rominger EM. The Gordian knot of mountain lion predation and bighorn sheep. *The*  
30 *Journal of Wildlife Management*. 2018;82(1):19-31.
- 31 26. USDA APHIS Wildlife Services. Wildlife Damage: United States Department of  
32 Agriculture; [cited 2020 August]. Available from:  
33 <https://www.aphis.usda.gov/aphis/ourfocus/wildlifedamage/>.
- 34 27. Peebles KA, Wielgus RB, Maletzke BT, Swanson ME. Effects of remedial sport hunting  
35 on cougar complaints and livestock depredations. *PLoS One*. 2013;8(11):e79713.
- 36 28. Dickson BG, Beier P. Quantifying the influence of topographic position on cougar (*Puma*  
37 *concolor*) movement in southern California, USA. *J Zool*. 2006;271(3):270-7. doi: 10.1111/j.1469-  
38 7998.2006.00215.x.
- 39 29. Wallach AD, Lundgren E, Batavia C, Nelson MP, Yanco E, Linklater W, et al. When all  
40 life counts in conservation. *Conserv Biol*. 2019;34(4):997-1007.
- 41 30. Sagoff M. Invasive species denialism: a reply to Ricciardi and Ryan. *Biol Invasions*. 2018.  
42 doi: 10.1007/s10530-018-1752-x.
- 43 31. Simberloff D. A succession of paradigms in ecology: essentialism to materialism and  
44 probabilism. *Synthese*. 1980;43(1):3-39.
- 45 32. Shafroth PB, Stromberg JC, Patten DT. Riparian Vegetation Response to Altered  
46 Disturbance and Stress Regimes. *Ecol Appl*. 2002;12(1):107-23. doi: 10.2307/3061140.
- 47 33. Middleton OS, Svensson H, Scharlemann JPW, Faurby S, Sandom CJ. CarniDIET: A  
48 database of terrestrial carnivorous mammal diets. *Glob Ecol Biogeogr*. 2021. doi:  
49 <https://onlinelibrary.wiley.com/doi/10.1111/geb.13296>.
- 50 34. Smith FA, Lyons SK, Ernest SKM, Jones KE, Kaufman DM, Dayan T, et al. Body mass of  
51 late Quaternary mammals. *Ecology*. 2003;84:3403-

- 1 35. Knopff KH, Knopff AA, Kortello A, Boyce MS. Cougar Kill Rate and Prey Composition in a  
2 Multiprey System. *Journal of Wildlife Management*. 2010;74(7):1435-47. doi: 10.2193/2009-314.
- 3 36. Human Ageing Genomic Resources [Internet]. 2020. Available from:  
4 <https://genomics.senescence.info/>.
- 5 37. Beier P, Choate D, Barrett RH. Movement patterns of mountain lions during different  
6 behaviors. *J Mammal*. 1995;76(4):1056-70.
- 7 38. Martin MT. Guide for Determining the Age of the Horse. American Associate of Equine  
8 Practitioners. 2002.
- 9 39. The Donkey Sanctuary. Guide to Ageing Donkeys.  
10 <https://www.donkeysanctuarycyprus.org/sites/cyprus/files/page/60-1492760833pdf>.  
11 2016; Accessed February 2018.
- 12 40. Nouvellet P, Rasmussen G, Macdonald D, Courchamp F. Noisy clocks and silent  
13 sunrises: measurement methods of daily activity pattern. *J Zool*. 2012;286(3):179-84.
- 14 41. Meredith M, Ridout M. Overview of the overlap package. *R Proj*. 2014:1-9.
- 15 42. Frey S, Fisher JT, Burton AC, Volpe JP. Investigating animal activity patterns and  
16 temporal niche partitioning using camera-trap data: challenges and opportunities. *Remote*  
17 *Sensing in Ecology and Conservation*. 2017;3(3):123-32.
- 18 43. PRISM Climate Group. PRISM Climate Data. In: Engineering NAFCS, editor. Oregon  
19 State University 2020.
- 20 44. Brooks ME, Kristensen K, van Benthem KJ, Magnusson A, Berg CW, Nielsen A, et al.  
21 glmmTMB Balances Speed and Flexibility Among Packages for Zero-inflated Generalized Linear  
22 Mixed Modeling. *The R Journal*. 2017;9(2):378-400.
- 23 45. Hsieh TC, Ma KH, Chao A. iNEXT: an R package for rarefaction and extrapolation of  
24 species diversity (Hill numbers). *Methods Ecol Evol*. 2016;7(12):1451-6. doi:  
25 <https://doi.org/10.1111/2041-210X.12613>.
- 26 46. Oksanen J, Blanchet FG, Friendly M, Kindt R, Legendre P, McGlenn D, et al. vegan:  
27 Community Ecology Package. R package version 25-4. 2019.
- 28 47. Hijmans RJ. geosphere: Spherical Trigonometry. R package version 15-10. 2019.
- 29 48. Goslee SC, Urban DL. The ecodist package for dissimilarity-based analysis of ecological  
30 data. *Journal of Statistical Software*. 2007;22(7):1-19.
- 31 49. The National Map [Internet]. United States Geologic Survey,. 2019.
- 32 50. Harrison XA, Donaldson L, Correa-Cano ME, Evans J, Fisher DN, Goodwin CED, et al. A  
33 brief introduction to mixed effects modelling and multi-model inference in ecology. *PeerJ*.  
34 2018;6:e4794. doi: 10.7717/peerj.4794.
- 35 51. The International Union for the Conservation of Nature Red List [Internet]. The  
36 International Union for the Conservation of Nature 2018.
- 37 52. Chao A, Gotelli NJ, Hsieh TC, Sander EL, Ma KH, Colwell RK, et al. Rarefaction and  
38 extrapolation with Hill numbers: a framework for sampling and estimation in species diversity  
39 studies. *Ecol Monogr*. 2014;84(45-67).
- 40 53. Ripple WJ, Estes JA, Beschta RL, Wilmers CC, Ritchie EG, Hebblewhite M, et al. Status  
41 and ecological effects of the world's largest carnivores. *Science*. 2014;343(6167):1241484. doi:  
42 10.1126/science.1241484. PubMed PMID: 24408439.
- 43 54. Wegge P, Shrestha R, Flagstad Ø. Snow leopard *Panthera uncia* predation on livestock  
44 and wild prey in a mountain valley in northern Nepal: implications for conservation management.  
45 *Wildlife Biology*. 2012;18(2):131-41.
- 46 55. Shehzad W, Nawaz MA, Pompanon F, Coissac E, Riaz T, Shah SA, et al. Forest without  
47 prey: livestock sustain a leopard *Panthera pardus* population in Pakistan. *Oryx*. 2015;49(2):248-  
48 53.
- 49 56. Fischhoff IR, Sundaesan SR, Cordingley J, Rubenstein DI. Habitat use and movements  
50 of plains zebra (*Equus burchelli*) in response to predation danger from lions. *Behav Ecol*.  
51 2007;18(4):725-9.

1 57. Grange S, Duncan P, Gaillard J-M, Sinclair AR, Gogan PJ, Packer C, et al. What limits  
2 the Serengeti zebra population? *Oecologia*. 2004;140(3):523-32.

3

4
